# Supplementary material for: Genome-Wide Analysis of Odorant-Binding Proteins and Chemosensory Proteins in the Bean bug Riptortus pedestris
Source: Front Physiol. 2022 Jul 14;13:949607. doi: 10.3389/fphys.2022.949607 (PMC9329939; doi:10.3389/fphys.2022.949607)
Supplement: Supplementary file 1 [file Table1.XLS]

## Sheet: Sheet1
Table S1. Primers used for RT-qPCR in this study
Name	GeneID	Forward (5'-3')		Reverse (5'-3')
Odorant Binding Protein (OBP)
RpedOBP1	Rp.chr1.1194	GTGTTCCTTTCAAGCCTTAG	:	TCCAGTATTTGTCTCTTCCA	:
RpedOBP2	Rp.chr1.1641	AATAGGAGAGGAGGCAATG	:	CTGTTCCTTGTGGTTGATT	:
RpedOBP3	Rp.chr1.1971	CCTCCTTCAATGTGTGTA	:	GCACTGATTGTATTGTAGC	:
RpedOBP4	Rp.chr2.0376	GTGTGATGGAACAACTGAA	:	GATTCTGTGAGTGCTGTAAC	:
RpedOBP5	Rp.chr2.0393	TCGGAGAAGAGGTAAGGA	:	GCAGGTGCTGTTTGTAAG	:
RpedOBP6	Rp.chr2.0394	TTCTCCTCCTCTTGCTTATC	:	GGGCTTCGGTTTACATTC	:
RpedOBP7	Rp.chr2.0395	GTGTATTGATGAGTGCTTCT	:	TTGTTATCGCTTCTTCTGC	:
RpedOBP8	Rp.chr2.0396	GACGACGCTGTTTGTAAA	:	TTTCTCCATCAGGGCTTT	:
RpedOBP9	Rp.chr2.0983	TCAGATTGGCTTAGACAGAT	:	TCACAACTTCCTTCCACAT	:
RpedOBP10	Rp.chr2.1234	AAGAGATGAATGCGATACAG	:	GACTGGAGGAAGGTTGAT	:
RpedOBP11	Rp.chr2.1239	CAGTAGACAGCACCATTTAG	:	CCAATCCAAACTCCTTCAG	:
RpedOBP12	Rp.chr2.1378	TTGGCAGATAAGGCTTACT	:	TGTGAAATAGCAGTTGAGTG	:
RpedOBP13	Rp.chr2.1485	ATTGGAAGACCGACATCA	:	ATGAATCCCACACCTCTG	:
RpedOBP14	Rp.chr2.1635	GCTGGACTTATCCTCATCA	:	GCTTTGCCTTGTCTTCTG	:
RpedOBP15	Rp.chr2.1704	ACACTGAAGTCAAGAATCCT	:	TTCCAATAGGTGCGTCTT	:
RpedOBP16	Rp.chr2.1706	AAGGTGACGGAACAATAGA	:	TATCTTGACTTCAGCAGCA	:
RpedOBP17	Rp.chr2.2024	CAAAGATGATGCCGAAGAT	:	CCTCCACAGATAGCCATT	:
RpedOBP18	Rp.chr2.2170	AAACCAAAGCGTCTCAAG	:	CACCATCTTCAGTCATAGTTC	:
RpedOBP19	Rp.chr2.3105	ACTCTCAAGCACCTACAC	:	TCTCTTCTGTAACCTCCATC	:
RpedOBP20	Rp.chr2.3220	TCAATCTTCCACCTTCTGT	:	GAGCCTTCTTCAGACATTG	:
RpedOBP21	Rp.chr2.3271	TTATCTTGGCTGCGTTATG	:	CCTTCTGCTCCTTGACAT	:
RpedOBP22	Rp.chr2.3272	AGGGCTAAATGCTTCGTA	:	GACTCCACTATCTCATCCTT	:
RpedOBP23	Rp.chr2.3273	TACAAAGTGCCATCTCGT	:	ACTGTGCTCACCTCAAAT	:
RpedOBP24	Rp.chr2.3274	TTTCTTGGAGTGCGTGAT	:	TTTGCCTTGTCTTCTTTGG	:
RpedOBP25	Rp.chr2.3275	CACTATCACCTGCTACCTC	:	ACAGATTCTTCATCGTCGTA	:
RpedOBP26	Rp.chr2.3276	TGAAGGATGCCAGAATGA	:	AGTTGTAACTGAGCCTCTT	:
RpedOBP27	Rp.chr2.3278	CAGATACGGAGATGAAGAATC	:	GGACGCAACCAATTAAGT	:
RpedOBP28	Rp.chr2.3320	AGTGCTACCTTGTATCAGTT	:	CTCTTCTTCCATTCTTCCTCTA	:
RpedOBP29	Rp.chr2.3321	GCTGAGACATTCCGAGATA	:	CAATAGGCACTTTCCATCC	:
RpedOBP30	Rp.chr2.3326	GACACATTCCGAGATATGC	:	CACCAATGGCTTCAAGAC	:
RpedOBP31	Rp.chr2.3445	AACGGAAGGCGAAGATTA	:	AAGCAGGAGTGTTCATCT	:
RpedOBP32	Rp.chr2.3446	CAGTAAGGTCGTGTTCAGA	:	GCTAGAAGAATTGCTGGTAG	:
RpedOBP33	Rp.chr2.3447	GTGCTTCCTAAAGTGTGTC	:	GCAGGCATCTATTACATTGA	:
RpedOBP34	Rp.chr3.2341	ATGGGCTGGACATAAGAG	:	ACATTTCCCTCCTTCCTTT	:
RpedOBP35	Rp.chr3.2343	GTATTGTTCTCCTCGCTTG	:	AACTTTCAGTGCTTCAACC	:
RpedOBP36	Rp.chr3.2431	ATCAAGGACAACCCAGAA	:	AGTAATGCCAGCCTCTTT	:
RpedOBP37	Rp.chr3.2644	ATGGGAGCGATTTCTGAT	:	ATAGCGGTTTCACATCCA	:
RpedOBP38	Rp.chr5.1134	GGATAGAGTGGATGAGATTCA	:	AGCATTTCAGAGCCAGATA	:
RpedOBP39	Rp.chr5.2242	ACATCTTCCTTTCTCATTGC	:	AGTGTCCCGTTCATAATCA	:
RpedOBP40	Rp.chr5.2243	ACATCTTCCTTTCTCATTGC	:	AGTGTCCCGTTCATAATCA	:
RpedOBP41	Rp.chr5.2244	GCACAAGCAACTGATGAT	:	AAGCACTTTCCGTCTTCA	:
RpedOBP42	Rp.chr5.2493	GCGTAGATACATGCTTGG	:	CAGTTCAGGAGGACAGTT	:
RpedOBP43	Rp.chr5.2533	CGTCGAAAGAGTCAAAGAAA	:	TATTGGTAAGCAGTCTCACA	:
RpedOBP44	Rp.chr5.2536	GGAAATGTCAGCGAAATACT	:	CTTCTGATAATCTCGTCACTTC	:
RpedOBP45	Rp.chr5.2537	TGTCAGCAGCATACTTGT	:	CAGTTTCTTTCTGGCATTCT	:
RpedOBP46	Rp.chr5.2538	CTTACTTGCTTACTGCTCTC	:	TTCTTTCTGGCATTCTTCTG	:
RpedOBP47	Rp.chr5.2539	AAAGTACCACCTCCATTAGT	:	CAGTTGATTCCGTCCTTG	:
RpedOBP48	Rp.chr5.2578	CCTGCCTTGTTCTTCTTATG	:	CTTGTAACCTGTTTCCTTGG	:
RpedOBP49	Rp.scaffold.288	TTTCCTGGCTTGTGTCAT	:	CATCTTCCTTAGAGCATTCTTC	:
Chemosensory Protein (CSP)			:		:
RpedCSP1	Rp.chr1.2826	CCTTCACGATGCTATGGA	:	CCTGTAGATAGTTTGGATGATG	:
RpedCSP2	Rp.chr3.0416	GTCCTGGTGAGGTCTTAC	:	CTTCCAATGCTTCGTCTG	:
RpedCSP3	Rp.chr3.2183	CACCACCAAGTATGACAAC	:	TAGGGCATCAGGAAGAAG	:
RpedCSP4	Rp.chr3.2650	CGACGCCGATGTAGATAT	:	CAGAGAACACCTCAGAGAT	:
RpedCSP5	Rp.chr3.2651	CGGAGGAGGAAGAAGATG	:	GTTGAAGAAGCACTTGAGAT	:
RpedCSP6	Rp.chr3.2661	ACGCATTGAAGACTGACT	:	TCGCCTTGTAAACTCCTT	:
RpedCSP7	Rp.chr3.2662	CACCAAGTACGACAACATAG	:	GAGTTCTTTGCCGTCTTC	:
RpedCSP8	Rp.chr3.2682	TCATGGTGGAGAAGAAGC	:	CTCTTGGCGTAGTAGTCC	:
RpedCSP9	Rp.chr3.2683	GGTGCTCAAGTTCCTCATA	:	ATCTTCCCTGTACTTCTTCC	:
RpedCSP10	Rp.chr3.2684	TGTCCTCAAGTTCGTCATT	:	CCTCTTCTCTGCTTCCTG	:
RpedCSP11	Rp.chr3.2687	AGACCTGGAGGAGATACT	:	GGTTCTGCTTGACTTGAG	:
RpedCSP12	Rp.chr3.2688	GGCACCAAGAAGGTCATA	:	CGGTTCGTATGTCTTCCT	:
RpedCSP13	Rp.chr3.2689	CTAGGAATCTGTCTGGTGTT	:	ATTTCGGCGTTACCTCTT	:
RpedCSP14	Rp.chr3.2690	CACCAAGTACGACAACATAG	:	CAATGCGTCAGGAATAGC	:
RpedCSP15	Rp.chr3.2692	CACCAAGTACGACAACATAG	:	CAATGCGTCAGGAATAGC	:
RpedCSP16	Rp.chr3.2693	CACCAAGTACGACAACATAG	:	CAATGCGTCAGGAATAGC	:
RpedCSP17	Rp.chr3.2694	CACCAAGTACGACAACATAG	:	CAATGCGTCAGGAATAGC	:
RpedCSP18	Rp.chr3.2695	CACCAAGTACGACAACATAG	:	CAATGCGTCAGGAATAGC	:
RpedCSP19	Rp.chr3.2696	CACCAAGTACGACAACATAG	:	CAATGCGTCAGGAATAGC	:
RpedCSP20	Rp.chr3.2697	TCCACCAAGTATGACAACA	:	CGGAATCGCTTCTTTGAG	:
RpedCSP21	Rp.chr3.2698	TCCACCAAGTATGACAACA	:	CTTCTTTGAGCAGTTTAGCA	:
RpedCSP22	Rp.chr3.2699	CCACCAGGTATGACAACA	:	GGCAGGTTATCTTTGAGTTC	:
RpedCSP23	Rp.chr5.2503	TGGAGTCATAGTCCTTGC	:	GTCATTGGCGAGTATCTTATC	:
RpedCSP24	Rp.chrX.0381	GCAGAAGGTAATGAAAGTGA	:	CTTATCTTGAACCAGGACTTC	:
RpedCSP25	Rp.chrX.0979	AGTACATTGACTGCCTCAT	:	TCCTGCCATCTTCTTCTG	:
