# Supplementary material for: Genome-Wide Analysis of Odorant-Binding Proteins and Chemosensory Proteins in the Bean bug Riptortus pedestris
Source: Front Physiol. 2022 Jul 14;13:949607. doi: 10.3389/fphys.2022.949607 (PMC9329939; doi:10.3389/fphys.2022.949607)
Supplement: Supplementary file 2 [file Table3.XLS]

## Sheet: Table S3
Table S3. The sequences similarity of RpedOBPs and RpedCSPs
Name	RpedOBP1	RpedOBP2	RpedOBP3	RpedOBP4	RpedOBP5	RpedOBP6	RpedOBP7	RpedOBP8	RpedOBP9	RpedOBP10	RpedOBP11	RpedOBP12	RpedOBP13	RpedOBP14	RpedOBP15	RpedOBP16	RpedOBP17	RpedOBP18	RpedOBP19	RpedOBP20	RpedOBP21	RpedOBP22	RpedOBP23	RpedOBP24	RpedOBP25	RpedOBP26	RpedOBP27	RpedOBP28	RpedOBP29	RpedOBP30	RpedOBP31	RpedOBP32	RpedOBP33	RpedOBP34	RpedOBP35	RpedOBP36	RpedOBP37	RpedOBP38	RpedOBP39	RpedOBP40	RpedOBP41	RpedOBP42	RpedOBP43	RpedOBP44	RpedOBP45	RpedOBP46	RpedOBP47	RpedOBP48	RpedOBP49
RpedOBP1	100	18.41	33.33	19.18	32.02	22.37	29.92	33.33	21.07	34.83	27.87	29.38	26.61	36.42	23.08	27.81	12.82	20.95	5.51	22.16	15.04	24.21	14.16	22.94	30.69	35.47	15.06	23.1	20.18	26.29	10.96	24.9	25.67	21.27	9.96	25.12	23.74	32.75	34.86	33.52	27.64	26.82	27.07	23.67	26.11	27.45	29.28	28.65	31.89
RpedOBP2	18.41	100	14.57	14.72	18.51	16.18	18.6	17.63	27.2	15.63	13.06	9.51	0.58	9.97	15.68	12.12	18.55	10.34	16.71	10	11.58	15.74	12.68	17.01	15.62	11.76	15.14	24.7	12.6	14.04	11.08	16.84	11.66	11.6	14.53	16.27	13.82	12.57	14.57	14.86	13.73	18.26	14.71	13.43	15.25	15.01	13.39	12.46	13.2
RpedOBP3	33.33	14.57	100	28.5	24.17	13.31	24.27	27.35	22.3	30.73	29.67	30.23	23.68	26.55	30.86	30.86	35.15	37.5	30.36	32.74	32.76	29.65	26.14	35.71	28.41	16.19	13.14	17.67	35.12	36.14	27.95	26.87	34.38	32.04	29.71	34.1	30.46	29.82	29.12	28.02	30.81	25.96	35.19	33.14	33.14	37.57	31.79	31.87	34.52
RpedOBP4	19.18	14.72	28.5	100	22.69	7.02	22.83	27.91	24.54	29.55	38.99	32.08	25.11	57.89	39.35	35.48	36.25	34.81	35	29.37	27.65	32.12	32.24	39.87	37.65	27.75	10.3	21.12	30.77	31.14	18.89	25.79	32.26	43.98	40.38	40.65	31.65	36.31	40.13	40.13	47.74	26.47	27.68	32.32	29.82	30.59	26.44	35.71	36.08
RpedOBP5	32.02	18.51	24.17	22.69	100	41.89	40.26	46.58	22.53	25.57	20.18	16.06	35.68	24.41	20.64	14.98	22.75	25.91	20.09	22.01	24.27	25.73	23.32	25.58	18.34	21.46	15.2	10.18	28.5	21.56	14.04	23.17	21.97	26.89	26.44	21	23.9	12.16	28.06	25.62	23.96	28	22.89	14.89	30.26	25.58	23.22	24.66	16.33
RpedOBP6	22.37	16.18	13.31	7.02	41.89	100	36.24	49.25	19.55	16.95	11.95	13.66	25.95	9.63	12.71	13.49	18.12	13.91	0.51	13.16	12.38	18.53	16.79	17.23	15.33	7.12	13	5.42	16.15	19.05	13.55	8.18	14.34	21.63	14.77	11.36	14.7	13.91	15.59	15.59	12.87	17.17	17.89	14.94	15.53	21.61	21.05	14.77	17.69
RpedOBP7	29.92	19.29	24.27	22.83	40.26	36.24	100	41.15	34.59	20.38	19.92	21.37	31.84	24.79	22.55	23.08	22.17	25.45	14.34	22.73	24.45	28.7	18.7	21.58	21.43	22.57	21.43	23.08	18	21.22	22.17	29.41	26.13	25.83	24.79	22.94	21.65	21.49	21.12	21.12	22.27	29.75	25.81	25.22	23.93	25.1	23.71	25.34	27.11
RpedOBP8	33.33	17.63	27.35	27.91	46.58	49.25	41.15	100	27.15	25.12	24.66	28.91	40.09	21.08	26.21	20.26	25.46	26.05	2.55	24.88	19.05	23.72	4.21	28.77	7.72	15.32	15.06	24.05	23.53	22.17	23.3	24.81	21.92	21.99	28.71	26.76	25.82	10.36	25.37	25.37	25.25	32.02	25.94	23.77	29.58	26.98	24.2	26.54	20.44
RpedOBP9	21.07	27.2	22.3	24.54	22.53	19.55	34.59	27.15	100	21.77	21.43	23.85	30.25	18.18	22.96	17.33	19.05	24.9	20.54	21.71	21.24	22.48	18.53	21.07	20.83	9.46	21.34	22.85	22.44	19.05	20.93	22.33	16.6	23.74	24.11	24.15	20.16	21.29	23.66	23.28	23.08	24.46	20.95	21.8	23.11	23.31	23.37	23.02	25.78
RpedOBP10	34.83	15.63	30.73	29.55	25.57	16.95	20.38	25.12	21.77	100	34.9	35.33	26.47	30.67	40.14	28.21	38.82	34.64	23.16	36.18	31.01	30.92	38.93	36.75	37.27	34.84	11.26	17.67	39.73	39.87	31.54	22.42	32.47	32.24	41.22	30.57	32.88	36.65	36.94	37.01	43.54	27.69	39.19	32.72	33.96	35.15	32.74	36.49	41.4
RpedOBP11	27.87	13.06	30.68	38.99	20.18	11.95	19.92	24.66	21.43	34.9	100	37.96	16.05	45.04	58.65	40	48.15	44.85	35.9	45.86	33.11	31.82	42.42	46.85	48.89	32.45	28.16	18.33	34.01	33.79	31.11	27.59	35.04	43.48	53.38	61.94	35.77	48.55	60.47	60.47	60.47	26.6	39.71	39.86	37.67	38.62	35.04	40.58	37.06
RpedOBP12	29.38	9.51	30.23	32.08	16.06	13.66	21.37	28.91	23.85	35.33	37.96	100	18.49	37.76	34.87	37.5	38.93	46.67	36.18	43.8	38.97	26.47	36.5	35.33	32.89	25.44	21.47	18.01	47.48	42.86	33.33	29.81	35.21	38.12	36.55	40.44	37.59	43.57	43.07	42.34	43.57	29.57	35.21	36.65	35.12	36.53	33.33	42.03	38.73
RpedOBP13	26.61	0.58	23.68	25.11	35.68	25.95	31.84	40.09	30.25	26.47	16.05	18.49	100	30.92	26.5	22.06	25.48	22.22	23.36	26.09	6.52	20.66	24	19.91	26	23.92	13.44	16.35	24.62	24.31	21.54	20.99	27.32	20.42	25.62	16.97	24.5	28.02	22.79	23.26	26.7	33.64	24.37	26.73	27.27	28.64	27.45	23.27	30.5
RpedOBP14	36.42	9.97	26.55	57.89	24.41	9.63	19.75	21.08	18.18	30.67	45.04	37.76	30.92	100	47.73	42.11	41.43	36.17	26.83	35.51	40.31	37.31	37.5	40.56	39.16	33.55	30.71	16.5	39.55	39.1	30.15	29.21	36.62	39.74	50	49.24	35.82	38.3	48.48	48.48	52.67	21.78	40.77	37.24	35.17	35.1	31.03	38.3	37.76
RpedOBP15	23.08	15.68	30.86	39.35	20.64	12.71	22.55	26.21	22.96	40.14	58.65	34.87	26.5	47.73	100	47.01	52.17	42.22	33.33	44.09	31.03	35.71	44.19	47.14	45.93	31.21	38.16	20.61	47.01	44.19	32.84	28.08	38.69	60	66.41	70.63	38.97	39.57	61.11	60.32	71.65	19.55	43.41	40	39.86	39.16	37.5	45.93	40.79
RpedOBP16	27.81	12.12	30.86	35.48	14.98	13.49	23.08	20.26	17.33	28.21	40	38.62	21.36	42.11	47.01	100	40.15	35.97	31.82	36.57	35.56	40.77	43.9	40.85	34.9	27.63	31.69	17.82	48.89	47.41	50.41	40.32	57.26	39.24	37.41	40	37.98	34.01	46.62	47.37	51.13	27.07	58.2	49.62	47.06	48.91	48.46	59.68	46.62
RpedOBP17	12.82	18.55	35.15	36.25	22.75	18.12	22.17	25.46	19.05	38.82	48.15	38.93	25.48	39.58	52.17	40.15	100	44.53	38.67	47.1	40.44	38.3	38.35	44.68	48.92	31.25	32.26	7.9	38.35	41.22	33.33	28.92	37.96	39.62	46.32	51.88	35.46	45.77	50	50.38	48.55	25.87	45.86	37.25	32.92	34.78	36.88	38.24	43.15
RpedOBP18	20.95	10.34	37.5	34.81	25.91	13.91	25.45	26.05	24.9	34.64	44.85	46.67	22.22	36.17	42.22	35.97	44.53	100	39.57	48.59	42.64	35.42	39.55	35.53	43.66	32.41	30.14	6.9	48.2	53.08	33.08	28.64	41.48	35.95	42.45	46.21	42.74	46.72	40.15	39.39	45.52	17.81	40.74	46.04	44.29	47.14	35.71	38.3	43.8
RpedOBP19	5.51	16.71	30.36	35	20.09	0.51	14.34	2.55	20.54	23.16	35.9	36.18	23.36	26.83	33.33	31.82	39.86	39.57	100	35.81	31.54	30.72	30.32	32.14	33.97	22.35	23.03	16.19	27.98	28.4	30.34	26.32	37.32	27.68	31.68	34.44	25.62	34	37.66	38.06	34.87	25.89	35.62	35.71	35.44	36.36	35.53	37.41	44.37
RpedOBP20	22.16	10	32.74	29.37	22.01	13.16	22.73	24.88	21.71	36.18	45.86	43.8	26.09	35.51	44.09	36.57	47.1	48.59	35.81	100	30.71	31.54	39.53	37.84	43.7	21.97	29.94	18.01	55.64	51.82	38.28	30.81	42.64	29.88	44.27	42.19	32.86	47.01	40	40	47.69	29.63	37.4	34.69	36.18	34.19	39.73	44.27	40.29
RpedOBP21	15.04	11.58	32.76	27.65	24.27	12.38	24.45	19.05	21.24	31.01	33.11	38.97	6.52	40.31	31.03	35.56	40.44	42.64	31.54	30.71	100	41.6	31.85	38.19	38.41	21.89	33.11	16.67	36.3	39.72	33.59	24.88	35.97	27.81	41.04	36.84	54.1	44.44	37.98	33.81	37.98	24.23	44.44	39.16	34.97	37.93	32.59	40.91	37.06
RpedOBP22	24.21	15.74	29.65	32.12	25.73	18.53	28.7	23.72	22.48	30.92	31.82	26.47	20.66	37.31	35.71	40.77	38.3	35.42	30.72	31.54	41.6	100	35.11	37.93	36.3	28.13	33.11	16.95	35.77	32.03	38.1	27.94	42.97	30.92	29.94	33.33	42.31	28.92	37.88	36.36	36.88	29.57	49.59	41.26	42.03	39.31	39.29	37.59	38.46
RpedOBP23	14.16	12.68	26.14	32.24	23.32	16.79	18.7	4.21	18.53	38.93	42.42	36.5	24	37.5	44.19	43.9	38.35	39.55	30.32	39.53	31.85	35.11	100	37.67	43.07	25.85	24.05	11.96	40.31	43.41	39.29	23.62	38.35	33.99	45.04	44.96	34.65	34.93	47.66	46.88	48.06	22.87	42.06	36.55	38.51	35.17	35.42	40.32	41.09
RpedOBP24	22.94	17.01	35.71	39.87	25.58	17.23	21.58	28.77	21.07	36.75	46.85	35.33	19.91	40.56	47.14	40.85	44.68	35.53	32.93	37.84	38.19	37.93	37.67	100	45.83	27.38	34.39	18.5	42.03	43.66	31.65	31.19	39.42	43.79	39.19	44.76	38.73	39.19	46.1	46.1	48.23	25.87	42.03	36.25	39.49	42.04	34.62	41.01	43.62
RpedOBP25	30.69	15.62	28.41	37.65	6.79	15.33	21.43	7.72	20.83	37.27	48.89	36.88	26	39.16	45.93	34.9	48.92	43.66	33.97	43.7	38.41	36.3	43.07	45.83	100	48.51	45.7	25.68	44.12	44.37	29.41	26.6	36.3	47.74	48.89	48.89	41.3	42.47	48.15	48.15	51.85	25.89	42.65	38.51	35.58	36.54	34.69	43.48	36.81
RpedOBP26	35.47	11.76	16.19	27.75	21.46	7.12	22.57	15.32	9.46	34.84	32.45	25.44	23.92	33.55	31.21	27.63	31.25	32.41	22.35	21.97	21.89	28.13	25.85	27.38	48.51	100	38.82	21.05	32.26	24.54	29.92	18.89	29.05	32.32	19.58	33.57	26.85	33.77	28.48	28.48	36.43	8.63	31.11	27.39	26.06	31.13	28.93	28.47	19.57
RpedOBP27	15.06	15.14	13.14	10.3	15.2	13	21.43	15.06	21.34	11.26	28.16	21.47	13.44	30.71	38.16	31.69	33.55	30.14	23.03	29.94	33.11	33.11	24.05	34.39	45.7	39.6	100	23.67	8.26	12.56	20.92	5.69	34.75	40.48	32.24	39.72	35.56	26.37	36.17	35.46	30.43	13.47	27.22	29.03	35.22	33.54	29.14	33.79	24.29
RpedOBP28	23.1	23.97	17.67	21.12	10.18	5.42	23.08	24.05	22.85	17.67	18.33	18.01	16.35	16.5	20.61	17.82	7.9	6.9	16.19	18.01	16.67	16.95	11.96	18.5	25.68	21.05	23.67	100	19.66	19.02	12.42	21.41	19.06	17.96	19.4	21.85	16.55	20.6	19.67	18.3	21.24	20.38	6.28	9.55	8.33	7.84	18.03	19.61	9.22
RpedOBP29	20.18	12.6	35.12	30.77	28.5	16.15	18	23.53	22.44	39.73	34.01	47.48	24.62	39.55	47.01	48.89	38.35	48.2	27.98	56.06	36.3	35.77	40.31	42.03	44.12	32.26	8.26	19.66	100	85.71	36.15	30.46	42.22	35.29	42.22	43.17	40.77	48.89	45.86	47.76	50.39	24.24	42.11	34.97	32.43	35.21	41.96	46.15	39.44
RpedOBP30	28.21	14.04	36.14	31.14	21.56	17.73	21.22	22.17	19.05	39.87	33.79	42.86	24.31	39.1	44.19	47.41	41.22	53.08	28.4	51.82	39.72	32.03	43.41	43.66	44.37	7.83	12.56	19.02	85.71	100	35.88	30.24	44.44	32.35	39.57	41.98	36.43	39.86	44.85	44.85	46.27	14.41	39.55	38.62	34.9	38.26	40	45.38	43.97
RpedOBP31	10.96	11.08	27.95	18.89	14.04	13.55	22.17	23.3	20.93	31.54	31.11	33.33	21.54	30.15	32.84	50.41	33.33	33.08	30.34	38.28	33.59	38.1	39.29	31.65	29.41	29.92	20.92	12.42	36.15	35.88	100	41.94	50.41	30.82	38.35	36.76	30	32.85	33.59	33.59	38.93	24	43.9	34.35	33.09	38.81	35.04	50	40.63
RpedOBP32	24.9	16.84	26.87	25.79	23.17	8.18	29.41	24.81	22.33	22.42	27.59	29.81	20.99	29.85	28.08	40.32	28.92	28.64	26.32	30.81	24.88	27.8	23.62	31.19	26.6	18.89	9.77	21.41	30.46	30.24	41.94	100	39.78	29.63	33.67	27.92	26.29	27.94	30.81	30.81	32.32	28.45	32.65	31.47	30.65	33.67	31.55	37.89	32.46
RpedOBP33	25.67	11.66	34.38	32.26	21.97	14.34	26.13	21.92	16.6	32.47	35.04	35.21	27.32	36.62	38.69	57.26	37.96	41.48	37.32	42.64	35.97	42.97	38.35	39.42	36.3	29.05	34.75	19.06	42.22	44.44	50.41	39.78	100	32.34	39.01	38.46	43.55	38.41	41.35	40.6	45.45	26.92	53.33	43.94	39.13	46.97	44.96	57.98	48.82
RpedOBP34	21.27	11.6	32.04	43.98	26.89	21.63	25.83	21.99	23.74	32.24	43.48	38.12	20.42	39.74	60	39.24	39.62	35.95	27.68	29.88	27.81	30.92	33.99	43.79	47.74	32.32	40.48	17.96	35.29	32.35	30.82	29.63	32.34	100	59.73	58.39	27.65	40.25	53.69	53.02	60.67	16.67	26.86	39.77	32.77	37.28	33.13	38.31	41.56
RpedOBP35	9.96	14.53	29.71	40.38	26.44	14.77	24.79	28.71	24.11	41.22	53.38	36.55	25.62	50	66.41	37.41	46.32	42.45	31.68	44.27	41.04	29.94	45.04	39.19	48.89	19.58	32.24	19.4	42.22	41.04	38.35	33.67	39.01	59.73	100	72.44	40.6	40.43	60.77	60.77	70.31	22.75	43.61	41.26	38.36	41.78	38.89	41.35	48.92
RpedOBP36	25.12	16.27	34.1	40.65	21	11.36	22.94	26.76	24.15	30.57	61.94	40.44	16.97	49.24	70.63	40	51.88	46.21	34.44	42.19	36.84	33.79	44.96	44.76	48.89	33.57	39.72	21.85	43.17	41.98	36.76	27.92	38.46	58.39	72.44	100	39.1	46.04	59.2	59.2	69.29	26.53	30.72	38.57	35.53	39.04	33.79	43.85	43.06
RpedOBP37	23.74	13.82	30.46	31.65	23.9	14.34	21.65	25.82	20.16	32.88	35.77	37.59	24.5	35.82	38.97	37.98	35.46	42.74	25.62	33.57	54.1	42.31	34.65	38.73	41.3	26.85	35.56	16.55	40.77	36.43	30	26.29	43.55	27.65	40.6	39.1	100	40.58	41.09	40.31	45.45	28.72	43.65	39.13	40.43	40.85	34.29	38.28	36.43
RpedOBP38	32.75	12.57	29.82	36.31	7.89	13.91	21.49	10.36	21.29	36.65	48.55	43.57	28.02	38.3	40.29	34.01	45.77	46.72	34	47.01	44.44	30.3	34.93	39.19	42.47	33.77	26.37	20.6	47.76	39.86	32.85	27.94	38.41	40.25	40.43	46.04	40.58	100	41.01	41.01	44.93	24.52	42.18	43.24	38.85	40.4	39.73	38.41	45.21
RpedOBP39	34.86	14.57	29.12	40.13	28.06	15.59	21.12	25.37	23.66	36.94	60.47	43.07	22.79	48.48	61.11	46.62	50	40.15	37.66	40	33.81	37.88	47.66	46.1	48.15	28.48	36.17	19.67	45.86	44.85	33.59	30.81	41.35	53.69	60.77	59.2	41.09	41.01	100	99.19	77.78	26.67	44.88	38.57	38.85	40.29	39.73	44.6	52.55
RpedOBP40	33.52	14.86	28.02	40.13	25.62	15.59	21.12	25.37	22.39	37.01	60.47	42.34	23.26	48.48	60.32	47.37	50.38	39.39	38.06	40	33.81	36.36	46.88	46.1	48.15	28.48	35.46	18.3	47.76	44.85	33.59	30.81	40.6	53.02	60.77	59.2	40.31	41.01	99.19	100	77.78	26.67	44.09	37.86	38.13	39.57	40.28	46.27	51.82
RpedOBP41	27.64	13.73	30.81	47.74	23.96	12.87	22.27	25.25	23.08	43.54	60.47	43.57	26.7	52.67	71.65	51.13	48.55	45.52	34.87	47.69	37.98	36.88	48.06	48.23	51.85	36.43	30.43	21.24	50.39	46.27	38.93	32.32	45.45	60.67	70.31	69.29	45.45	44.93	77.78	77.78	100	23.76	43.18	39.29	40.28	43.06	41.91	50	47.55
RpedOBP42	26.82	18.26	25.96	26.47	28	17.17	29.75	32.02	24.46	27.69	26.6	29.57	33.64	21.78	19.72	27.07	25.87	17.81	26.94	29.63	24.23	29.57	22.87	25.87	25.89	8.63	13.47	20.38	24.24	14.41	24	28.45	26.92	16.67	22.75	26.53	28.72	24.52	26.67	26.67	23.76	100	28.42	30.39	30.81	29.35	25.13	29.83	19.72
RpedOBP43	17.84	14.71	35.19	27.68	22.89	17.89	25.81	25.94	20.95	39.19	39.71	35.21	24.37	40.77	43.41	58.2	45.86	40.74	35.62	37.4	44.44	49.59	42.06	42.03	42.65	31.11	27.22	6.28	42.11	39.55	43.9	32.65	53.33	26.86	43.61	30.72	43.65	42.18	44.88	44.09	43.18	28.42	100	62.88	64.66	68.42	58.59	53.23	53.54
RpedOBP44	23.67	13.43	33.14	32.32	14.89	14.94	25.22	23.77	21.8	32.72	39.86	36.65	26.73	37.24	40	49.62	37.25	46.04	35.71	34.69	39.16	41.26	36.55	36.25	38.51	27.39	29.03	9.55	34.97	38.62	34.35	31.47	43.94	39.77	41.26	38.57	39.13	43.24	38.57	37.86	39.29	30.39	62.88	100	79.39	80.92	53.73	42.22	45.14
RpedOBP45	26.11	15.25	33.14	29.82	30.26	15.53	23.93	29.58	23.11	33.96	37.67	35.12	27.27	35.17	39.86	47.06	32.92	44.29	35.44	36.18	34.97	42.03	38.51	39.49	35.58	26.06	35.22	8.33	32.43	34.9	33.09	30.65	39.13	32.77	38.36	35.53	40.43	38.85	38.85	38.13	40.28	30.81	64.66	79.39	100	91.6	58.02	42.07	43.26
RpedOBP46	27.45	15.01	37.57	30.59	25.58	21.61	25.1	26.98	23.31	35.15	38.62	36.53	28.64	35.1	39.16	48.91	34.78	47.14	36.36	34.19	37.93	39.31	35.17	42.04	36.54	31.13	33.54	7.84	35.21	38.26	38.81	33.67	46.97	37.28	41.78	39.04	40.85	40.4	40.29	39.57	43.06	29.35	68.42	80.92	91.6	100	60.15	45	46.1
RpedOBP47	29.28	13.39	31.79	26.44	23.22	21.05	23.71	24.2	23.37	32.74	35.04	33.33	27.45	31.03	37.5	48.46	36.88	35.71	35.53	39.73	32.59	39.29	35.42	34.62	34.69	28.93	29.14	18.03	41.96	41.55	35.04	31.55	44.96	33.13	38.89	33.79	34.29	39.73	39.73	40.28	41.91	25.13	58.59	53.73	58.02	60.15	100	43.7	46.04
RpedOBP48	28.65	12.46	31.87	35.71	24.66	14.77	25.34	26.54	23.62	36.49	40.58	42.03	23.27	38.3	45.93	59.68	34.25	38.3	37.41	44.27	40.91	37.59	40.32	41.01	43.48	28.47	33.79	19.28	46.15	45.38	50	37.89	57.98	38.31	41.35	43.85	38.28	38.41	44.6	46.27	50	29.83	53.23	42.22	42.07	45	43.7	100	51.54
RpedOBP49	31.89	13.2	34.52	36.08	16.33	17.69	27.11	20.44	25.78	41.4	37.06	38.73	30.5	37.76	40.79	46.62	43.15	43.8	44.37	40.29	37.06	38.46	41.09	43.62	36.81	19.57	24.29	9.22	39.44	43.97	40.63	32.46	48.82	41.56	48.92	43.06	36.43	43.24	52.55	51.82	47.55	19.72	53.54	45.14	43.26	46.1	46.04	51.54	100
Name	RpedCSP1	RpedCSP2	RpedCSP3	RpedCSP4	RpedCSP5	RpedCSP6	RpedCSP7	RpedCSP8	RpedCSP9	RpedCSP10	RpedCSP11	RpedCSP12	RpedCSP13	RpedCSP14	RpedCSP15	RpedCSP16	RpedCSP17	RpedCSP18	RpedCSP19	RpedCSP20	RpedCSP21	RpedCSP22	RpedCSP23	RpedCSP24	RpedCSP25
RpedCSP1	100	30.34	60.18	41.03	43.97	55.75	55.75	54.92	57.52	56.64	47.2	57.26	37.57	60.18	60.18	56.64	57.52	58.41	58.41	57.39	58.62	52.54	53.64	30.91	58.88
RpedCSP2	30.34	100	28.67	26.67	25.31	30.87	30.87	26.25	31.13	28.19	27.33	29.19	29.89	31.37	31.37	28.67	28.67	29.33	29.33	25.68	22.78	31.29	34.46	22.5	34.93
RpedCSP3	60.18	28.67	100	40.16	50	73.21	73.21	66.39	84.68	87.39	54.47	73.04	48.6	73.21	73.21	74.11	74.11	75	75	76.99	76.32	76.72	70	32.93	68.47
RpedCSP4	41.03	26.67	40.16	100	78.07	43.8	43.8	43.75	42.86	45.08	34.85	50.83	32.2	43.65	43.65	39.34	42.62	41.8	40.16	43.44	43.44	44.17	50.83	24.86	45.13
RpedCSP5	43.97	25.31	50	78.07	100	47.9	47.9	45.67	44.44	47.93	37.4	51.69	35.2	46.4	46.4	45.38	44.63	43.8	43.7	47.93	47.93	47.97	54.31	35.71	50.89
RpedCSP6	55.75	30.87	73.21	43.8	47.9	100	100	62.18	73.87	70.8	53.66	70.43	40.88	88.29	88.29	90.74	91.67	92.59	92.59	75.22	73.68	71.79	67.57	33.33	67.26
RpedCSP7	55.75	30.87	73.21	43.8	47.9	100	100	62.18	73.87	70.8	53.66	70.43	40.88	88.29	88.29	90.74	91.67	92.59	92.59	75.22	73.68	71.79	67.57	33.33	67.26
RpedCSP8	54.92	26.25	66.39	43.75	45.67	62.18	62.18	100	66.39	66.39	47.24	64.46	42.22	61.34	61.34	61.34	63.87	63.87	63.87	66.39	65.55	64.17	55.46	31.55	54.1
RpedCSP9	57.52	31.13	84.68	42.86	44.44	73.87	73.87	66.39	100	81.25	52.85	71.3	47.09	72.97	72.97	72.97	72.97	73.87	73.87	78.76	77.19	76.72	67.83	35.37	66.37
RpedCSP10	56.64	28.19	87.39	45.08	47.93	70.8	70.8	66.39	81.25	100	53.97	71.55	49.43	71.68	71.68	71.68	71.68	71.68	71.68	78.76	78.07	80.17	66.96	35.15	72.32
RpedCSP11	47.2	27.33	54.47	34.85	37.4	53.66	53.66	47.24	52.85	53.97	100	54.03	39.55	52.85	52.85	52.03	55.28	54.47	54.47	52.85	54.47	53.66	48.8	29.55	47.97
RpedCSP12	57.26	29.19	73.04	50.83	51.69	70.43	70.43	64.46	71.3	71.55	54.03	100	42.61	70.43	70.43	69.57	70.43	71.3	71.3	72.41	74.14	69.17	61.16	40.24	61.21
RpedCSP13	37.57	29.89	48.6	32.2	35.2	40.88	40.88	42.22	47.09	49.43	39.55	42.61	100	41.99	41.99	44.77	41.81	41.81	41.81	43.65	47.13	50.57	43.35	24.14	40.35
RpedCSP14	60.18	31.37	73.21	43.65	46.4	88.29	88.29	61.34	72.97	71.68	52.85	70.43	41.99	100	100	91.89	89.19	90.09	90.09	76.99	75.44	73.5	66.09	31.71	66.37
RpedCSP15	60.18	31.37	73.21	43.65	46.4	88.29	88.29	61.34	72.97	71.68	52.85	70.43	41.99	100	100	91.89	89.19	90.09	90.09	76.99	75.44	73.5	66.09	31.71	66.37
RpedCSP16	56.64	28.67	74.11	39.34	45.38	90.74	90.74	61.34	72.97	71.68	52.03	69.57	44.77	91.89	91.89	100	93.52	94.44	94.44	75.22	73.68	70.94	64.35	35.62	67.26
RpedCSP17	57.52	28.67	74.11	42.62	44.63	91.67	91.67	63.87	72.97	71.68	55.28	70.43	41.81	89.19	89.19	93.52	100	99.07	99.07	75.22	73.68	71.79	69.37	33.54	67.26
RpedCSP18	58.41	29.33	75	41.8	43.8	92.59	92.59	63.87	73.87	71.68	54.47	71.3	41.81	90.09	90.09	94.44	99.07	100	100	76.11	74.56	71.79	68.47	33.54	68.14
RpedCSP19	58.41	29.33	75	40.16	43.7	92.59	92.59	63.87	73.87	71.68	54.47	71.3	41.81	90.09	90.09	94.44	99.07	100	100	76.11	74.56	71.79	68.47	34.16	68.14
RpedCSP20	57.39	25.68	76.99	43.44	47.93	75.22	75.22	66.39	78.76	78.76	52.85	72.41	43.65	76.99	76.99	75.22	75.22	76.11	76.11	100	98.25	73.5	61.54	32.75	61.06
RpedCSP21	58.62	22.78	76.32	43.44	47.93	73.68	73.68	65.55	77.19	78.07	54.47	74.14	47.13	75.44	75.44	73.68	73.68	74.56	74.56	98.25	100	72.88	59.32	35.76	58.77
RpedCSP22	52.54	31.29	76.72	44.17	47.97	71.79	71.79	64.17	76.72	80.17	53.66	69.17	50.57	73.5	73.5	70.94	71.79	71.79	71.79	73.5	72.88	100	68.1	33.14	64.66
RpedCSP23	53.64	34.46	70	50.83	54.31	67.57	67.57	55.46	67.83	66.96	48.8	61.16	43.35	66.09	66.09	64.35	69.37	68.47	68.47	61.54	59.32	68.1	100	39.88	59.09
RpedCSP24	30.91	22.5	32.93	24.86	35.71	33.33	33.33	31.55	35.37	35.15	29.55	40.24	24.14	31.71	31.71	35.62	33.54	33.54	34.16	32.75	35.76	33.14	39.88	100	33.14
RpedCSP25	58.88	34.93	68.47	45.13	50.89	67.26	67.26	54.1	66.37	72.32	47.97	61.21	40.35	66.37	66.37	67.26	67.26	68.14	68.14	61.06	58.77	64.66	59.09	33.14	100
	30.34	22.5	28.67	24.86	25.31	30.87	30.87	26.25	31.13	28.19	27.33	29.19	24.14	31.37	31.37	28.67	28.67	29.33	29.33	25.68	22.78	31.29	34.46	22.5	33.14
